# Supplementary material for: Luminescence and energy transfer of a color tunable phosphor: Dy3+-, Tm3+-, and Eu3+-coactivated KSr4(BO3)3 for warm white UV LEDs
Source: Royal Society of Chemistry journal article supplement (doi:10.1039/c2jm15506k), 2012-01-01
Supplement: c2jm15506k.pdf [file c2jm15506k.pdf]

# Luminescence and Energy Transfer of a Color Tunable Phosphor: Dy<sup>3+</sup>-, Tm<sup>3+</sup>-, and Eu<sup>3+</sup>-Coactivated K<sub>2</sub>Sr<sub>4</sub>(BO<sub>3</sub>)<sub>3</sub> for Warm White UV LEDs

Li Wu<sup>\*a</sup>, Yi Zhang<sup>\*b</sup>, Mingyuan Gui<sup>a</sup>, Pengzhi Lu<sup>c</sup>, Lixia Zhao<sup>c</sup>, Shu Tian<sup>a</sup>, Yongfa Kong<sup>a</sup>, Jingjun Xu<sup>a</sup>

## Supplementary Information

Table S1. Fractional Atomic Coordinates and Equivalent Isotropic Displacement Parameters (Å<sup>2</sup>) for K(Sr, M)<sub>4</sub>(BO<sub>3</sub>)<sub>3</sub> (M=Dy, Tm)

|                                                                                                             | Site | x  | y          | z         | U <sub>eq</sub> | Occupancy  |           |
|-------------------------------------------------------------------------------------------------------------|------|----|------------|-----------|-----------------|------------|-----------|
| K(Sr <sub>0.98</sub> Dy <sub>0.02</sub> ) <sub>4</sub> (BO <sub>3</sub> ) <sub>3</sub>                      |      |    |            |           |                 |            |           |
|                                                                                                             | Sr1  | 4b | 0.25       | 0.3555(1) | 0.0624(1)       | 0.0113(1)  | 1.0000    |
|                                                                                                             | Sr2  | 8c | -0.0281(1) | 0.2145(1) | 0.9294(1)       | 0.0107(1)  | 0.960(1)  |
|                                                                                                             | Dy   | 8c | -0.0281(1) | 0.2145(1) | 0.9294(1)       | 0.0107(1)  | 0.040(1)  |
|                                                                                                             | Sr3  | 4a | 0          | 0         | 0.2829          | 0.0127(1)  | 1.0000    |
|                                                                                                             | K    | 4b | 0.25       | 0.5840(1) | 0.3278(3)       | 0.0407(5)  | 1.0000    |
|                                                                                                             | O1   | 4b | 0.25       | 0.3492(1) | 0.4495(3)       | 0.0086(5)  | 1.0000    |
|                                                                                                             | O2   | 4b | 0.25       | 0.5633(1) | 0.9074(3)       | 0.0211(5)  | 1.0000    |
|                                                                                                             | O3   | 8c | 0.1371(1)  | 0.6720(1) | 0.6699(1)       | 0.0041(3)  | 1.0000    |
|                                                                                                             | O4   | 8c | 0.0289(1)  | 0.4026(1) | 0.1081(2)       | 0.0034(3)  | 1.0000    |
|                                                                                                             | O5   | 8c | 0.8575(1)  | 0.1943(1) | 0.2384(2)       | 0.0055(3)  | 1.0000    |
|                                                                                                             | O6   | 4a | 0          | 0.5       | 0.4074(4)       | 0.0138(6)  | 1.0000    |
|                                                                                                             | B1   | 4b | 0.25       | 0.6377(3) | 0.7550(6)       | 0.0185(10) | 1.0000    |
|                                                                                                             | B2   | 4b | 0.25       | 0.3362(3) | 0.6516(5)       | 0.0037(9)  | 1.0000    |
|                                                                                                             | B3   | 4a | 0          | 0.5       | 0.2118(6)       | 0.0233(10) | 1.0000    |
| K(Sr <sub>0.985</sub> Tm <sub>0.015</sub> ) <sub>4</sub> (BO <sub>3</sub> ) <sub>3</sub>                    |      |    |            |           |                 |            |           |
|                                                                                                             | Sr1  | 4b | 0.25       | 0.3553(1) | 0.0643(1)       | 0.0115(1)  | 1.0000    |
|                                                                                                             | Sr2  | 8c | -0.0284(1) | 0.2148(1) | 0.9312(1)       | 0.0098(1)  | 0.9732(7) |
|                                                                                                             | Tm   | 8c | -0.0284(1) | 0.2148(1) | 0.9312(1)       | 0.0098(1)  | 0.0267(7) |
|                                                                                                             | Sr3  | 4a | 0          | 0         | 0.2829          | 0.0119(1)  | 1.0000    |
|                                                                                                             | K    | 4b | 0.25       | 0.5838(1) | 0.3310(3)       | 0.0281(5)  | 1.0000    |
|                                                                                                             | O1   | 4b | 0.25       | 0.3472(1) | 0.4515(3)       | 0.0082(5)  | 1.0000    |
|                                                                                                             | O2   | 4b | 0.25       | 0.5654(1) | 0.9117(3)       | 0.0171(5)  | 1.0000    |
|                                                                                                             | O3   | 8c | 0.1364(1)  | 0.6727(1) | 0.6688(1)       | 0.0068(4)  | 1.0000    |
|                                                                                                             | O4   | 8c | 0.0292(1)  | 0.4032(1) | 0.1088(2)       | 0.0053(3)  | 1.0000    |
|                                                                                                             | O5   | 8c | 0.8573(1)  | 0.1958(1) | 0.2393(2)       | 0.0063(4)  | 1.0000    |
|                                                                                                             | O6   | 4a | 0          | 0.5       | 0.4076(4)       | 0.0084(6)  | 1.0000    |
|                                                                                                             | B1   | 4b | 0.25       | 0.6415(3) | 0.7552(6)       | 0.0135(9)  | 1.0000    |
|                                                                                                             | B2   | 4b | 0.25       | 0.3308(3) | 0.6470(6)       | 0.0099(10) | 1.0000    |
|                                                                                                             | B3   | 4a | 0          | 0.5       | 0.2082(6)       | 0.0208(10) | 1.0000    |
| K(Sr <sub>0.985</sub> Dy <sub>0.01</sub> Tm <sub>0.005</sub> ) <sub>4</sub> (BO <sub>3</sub> ) <sub>3</sub> |      |    |            |           |                 |            |           |
|                                                                                                             | Sr1  | 4b | 0.25       | 0.3550(1) | 0.0629(1)       | 0.0121(1)  | 1.0000    |
|                                                                                                             | Sr2  | 8c | -0.0282(1) | 0.2147(1) | 0.9304(1)       | 0.0106(1)  | 0.976(1)  |
|                                                                                                             | Dy1  | 8c | -0.0282(1) | 0.2147(1) | 0.9304(1)       | 0.0106(1)  | 0.014(1)  |
|                                                                                                             | Tm   | 8c | -0.0282(1) | 0.2147(1) | 0.9304(1)       | 0.0106(1)  | 0.010(1)  |
|                                                                                                             | Sr3  | 4a | 0          | 0         | 0.2829          | 0.0116(1)  | 0.984(1)  |
|                                                                                                             | Dy2  | 4b | 0          | 0         | 0.2829          | 0.0116(1)  | 0.016(1)  |
|                                                                                                             | K    | 4b | 0.25       | 0.5834(1) | 0.3262(3)       | 0.0332(4)  | 1.0000    |
|                                                                                                             | O1   | 4b | 0.25       | 0.3489(1) | 0.4480(3)       | 0.0122(4)  | 1.0000    |
|                                                                                                             | O2   | 8c | 0.25       | 0.5569(1) | 0.9100(3)       | 0.0286(4)  | 1.0000    |
|                                                                                                             | O3   | 8c | 0.1379(1)  | 0.6712(1) | 0.6709(1)       | 0.0064(3)  | 1.0000    |
|                                                                                                             | O4   | 8c | 0.0277(1)  | 0.4040(1) | 0.1093(2)       | 0.0058(2)  | 1.0000    |
|                                                                                                             | O5   | 4a | 0.8572(1)  | 0.1927(1) | 0.2382(1)       | 0.0119(3)  | 1.0000    |
|                                                                                                             | O6   | 4b | 0          | 0.5       | 0.4025(3)       | 0.0047(4)  | 1.0000    |
|                                                                                                             | B1   | 4b | 0.25       | 0.6352(3) | 0.7633(5)       | 0.0173(8)  | 1.0000    |
|                                                                                                             | B2   | 4a | 0.25       | 0.3308(2) | 0.6472(4)       | 0.0045(7)  | 1.0000    |
|                                                                                                             | B3   | 4b | 0          | 0.5       | 0.2032(5)       | 0.0214(8)  | 1.0000    |

Table S2. Selected Interatomic Distances (Å) and Angles (deg) for  $K(\text{Sr}, \text{M})_4(\text{BO}_3)_3$  (M=Dy, Tm)

| $K(\text{Sr}_{0.95}\text{Dy}_{0.05})_4(\text{BO}_3)_3$                    |           |                                |            |                                                |           |
|---------------------------------------------------------------------------|-----------|--------------------------------|------------|------------------------------------------------|-----------|
| Sr(1)–O(1) <sup>i</sup>                                                   | 2.666(2)  | Sr(3)–O(2) <sup>viii</sup>     | 2.9812(7)  | B(1)–O(3) <sup>i</sup>                         | 1.433(2)  |
| Sr(1)–O(2) <sup>i</sup>                                                   | 2.708(2)  | Sr(3)–O(3) <sup>v</sup>        | 2.671(1)   | B(1)–O(3) <sup>ii</sup>                        | 1.433(2)  |
| Sr(1)–O(3) <sup>v</sup>                                                   | 2.633(1)  | Sr(3)–O(3) <sup>viii</sup>     | 2.671(1)   | B(2)–O(1) <sup>i</sup>                         | 1.399(4)  |
| Sr(1)–O(3) <sup>vi</sup>                                                  | 2.633(1)  | Sr(3)–O(4) <sup>v</sup>        | 2.545(1)   | B(2)–O(5) <sup>vii</sup>                       | 1.375(2)  |
| Sr(1)–O(4) <sup>i</sup>                                                   | 2.5185(9) | Sr(3)–O(4) <sup>viii</sup>     | 2.545(1)   | B(2)–O(5) <sup>viii</sup>                      | 1.375(2)  |
| Sr(1)–O(4) <sup>ii</sup>                                                  | 2.5185(9) | Sr(3)–O(5) <sup>i</sup>        | 2.824(1)   | B(3)–O(4) <sup>i</sup>                         | 1.405(2)  |
| Sr(1)–O(5) <sup>vii</sup>                                                 | 2.595(1)  | Sr(3)–O(5) <sup>iv</sup>       | 2.824(1)   | B(3)–O(4) <sup>iv</sup>                        | 1.405(2)  |
| Sr(1)–O(5) <sup>viii</sup>                                                | 2.595(1)  | Sr(3)–O(6) <sup>v</sup>        | 2.585(2)   | B(3)–O(6) <sup>i</sup>                         | 1.346(4)  |
| Sr(2)(Dy)–O(1) <sup>vii</sup>                                             | 2.5636(8) | K–O(1) <sup>i</sup>            | 2.935(2)   | O(2) <sup>i</sup> –B(1)–O(3) <sup>i</sup>      | 119.79(2) |
| Sr(2)(Dy)–O(3) <sup>iv</sup>                                              | 2.546(1)  | K–O(2) <sup>i</sup>            | 2.905(3)   | O(2) <sup>i</sup> –B(1)–O(3) <sup>ii</sup>     | 119.79(2) |
| Sr(2)(Dy)–O(3) <sup>v</sup>                                               | 2.512(1)  | K–O(3) <sup>i</sup>            | 2.863(2)   | O(3) <sup>i</sup> –B(1)–O(3) <sup>ii</sup>     | 120.15(2) |
| Sr(2)(Dy)–O(4) <sup>i</sup>                                               | 2.643(1)  | K–O(3) <sup>ii</sup>           | 2.863(2)   | O(1) <sup>i</sup> –B(2)–O(5) <sup>vii</sup>    | 117.48(2) |
| Sr(2)(Dy)–O(4) <sup>viii</sup>                                            | 2.619(1)  | K–O(5) <sup>iii</sup>          | 2.973(2)   | O(1) <sup>i</sup> –B(2)–O(5) <sup>viii</sup>   | 117.48(2) |
| Sr(2)(Dy)–O(5) <sup>i</sup>                                               | 2.484(1)  | K–O(5) <sup>iv</sup>           | 2.973(2)   | O(5) <sup>vii</sup> –B(2)–O(5) <sup>viii</sup> | 118.75(2) |
| Sr(2)(Dy)–O(5) <sup>viii</sup>                                            | 2.539(1)  | K–O(6) <sup>i</sup>            | 2.9816(10) | O(4) <sup>i</sup> –B(3)–O(4) <sup>iv</sup>     | 118.93(2) |
| Sr(2)(Dy)–O(6) <sup>v</sup>                                               | 2.5935(6) | K–O(6) <sup>ii</sup>           | 2.9816(10) | O(4) <sup>i</sup> –B(3)–O(6) <sup>i</sup>      | 120.54(2) |
| Sr(3)–O(2) <sup>v</sup>                                                   | 2.9812(7) | B(1)–O(2) <sup>i</sup>         | 1.377(4)   | O(4) <sup>iv</sup> –B(3)–O(6) <sup>i</sup>     | 120.54(2) |
| $K(\text{Sr}_{0.975}\text{Tm}_{0.025})_4(\text{BO}_3)_3$                  |           |                                |            |                                                |           |
| Sr(1)–O(1) <sup>i</sup>                                                   | 2.669(2)  | Sr(3)–O(2) <sup>viii</sup>     | 3.0015(8)  | B(1)–O(3) <sup>i</sup>                         | 1.436(2)  |
| Sr(1)–O(2) <sup>i</sup>                                                   | 2.729(1)  | Sr(3)–O(3) <sup>v</sup>        | 2.678(1)   | B(1)–O(3) <sup>ii</sup>                        | 1.436(2)  |
| Sr(1)–O(3) <sup>v</sup>                                                   | 2.624(1)  | Sr(3)–O(3) <sup>viii</sup>     | 2.678(1)   | B(2)–O(1) <sup>i</sup>                         | 1.361(4)  |
| Sr(1)–O(3) <sup>vi</sup>                                                  | 2.624(1)  | Sr(3)–O(4) <sup>v</sup>        | 2.548(1)   | B(2)–O(5) <sup>vii</sup>                       | 1.382(2)  |
| Sr(1)–O(4) <sup>i</sup>                                                   | 2.5212(9) | Sr(3)–O(4) <sup>viii</sup>     | 2.548(1)   | B(2)–O(5) <sup>viii</sup>                      | 1.382(2)  |
| Sr(1)–O(4) <sup>ii</sup>                                                  | 2.5212(9) | Sr(3)–O(5) <sup>i</sup>        | 2.842(1)   | B(3)–O(4) <sup>i</sup>                         | 1.386(2)  |
| Sr(1)–O(5) <sup>vii</sup>                                                 | 2.606(1)  | Sr(3)–O(5) <sup>iv</sup>       | 2.842(1)   | B(3)–O(4) <sup>iv</sup>                        | 1.386(2)  |
| Sr(1)–O(5) <sup>viii</sup>                                                | 2.606(1)  | Sr(3)–O(6) <sup>v</sup>        | 2.585(2)   | B(3)–O(6) <sup>i</sup>                         | 1.373(5)  |
| Sr(2)(Tm)–O(1) <sup>vii</sup>                                             | 2.5586(8) | K–O(1) <sup>i</sup>            | 2.956(2)   | O(2) <sup>i</sup> –B(1)–O(3) <sup>i</sup>      | 118.96(2) |
| Sr(2)(Tm)–O(3) <sup>iv</sup>                                              | 2.550(1)  | K–O(2) <sup>i</sup>            | 2.897(3)   | O(2) <sup>i</sup> –B(1)–O(3) <sup>ii</sup>     | 118.96(2) |
| Sr(2)(Tm)–O(3) <sup>v</sup>                                               | 2.499(1)  | K–O(3) <sup>i</sup>            | 2.850(2)   | O(3) <sup>i</sup> –B(1)–O(3) <sup>ii</sup>     | 121.43(2) |
| Sr(2)(Tm)–O(4) <sup>i</sup>                                               | 2.646(1)  | K–O(3) <sup>ii</sup>           | 2.850(2)   | O(1) <sup>i</sup> –B(2)–O(5) <sup>vii</sup>    | 119.23(3) |
| Sr(2)(Tm)–O(4) <sup>viii</sup>                                            | 2.633(1)  | K–O(5) <sup>iii</sup>          | 2.964(2)   | O(1) <sup>i</sup> –B(2)–O(5) <sup>viii</sup>   | 119.23(3) |
| Sr(2)(Tm)–O(5) <sup>i</sup>                                               | 2.478(1)  | K–O(5) <sup>iv</sup>           | 2.964(2)   | O(5) <sup>vii</sup> –B(2)–O(5) <sup>viii</sup> | 118.06(2) |
| Sr(2)(Tm)–O(5) <sup>viii</sup>                                            | 2.541(1)  | K–O(6) <sup>i</sup>            | 2.9825(9)  | O(4) <sup>i</sup> –B(3)–O(4) <sup>iv</sup>     | 120.76(2) |
| Sr(2)(Tm)–O(6) <sup>v</sup>                                               | 2.6003(5) | K–O(6) <sup>ii</sup>           | 2.9825(9)  | O(4) <sup>i</sup> –B(3)–O(6) <sup>i</sup>      | 119.62(3) |
| Sr(3)–O(2) <sup>v</sup>                                                   | 3.0015(8) | B(1)–O(2) <sup>i</sup>         | 1.413(4)   | O(4) <sup>iv</sup> –B(3)–O(6) <sup>i</sup>     | 119.62(3) |
| $K(\text{Sr}_{0.985}\text{Dy}_{0.015}\text{Tm}_{0.005})_4(\text{BO}_3)_3$ |           |                                |            |                                                |           |
| Sr(1)–O(1) <sup>i</sup>                                                   | 2.653(2)  | Sr(3)(Dy)–O(2) <sup>vii</sup>  | 2.9727(7)  | B(1)–O(3) <sup>i</sup>                         | 1.456(2)  |
| Sr(1)–O(2) <sup>i</sup>                                                   | 2.640(1)  | Sr(3)(Dy)–O(3) <sup>v</sup>    | 2.668(1)   | B(1)–O(3) <sup>ii</sup>                        | 1.456(2)  |
| Sr(1)–O(3) <sup>v</sup>                                                   | 2.635(1)  | Sr(3)(Dy)–O(3) <sup>viii</sup> | 2.668(1)   | B(2)–O(1) <sup>i</sup>                         | 1.389(3)  |
| Sr(1)–O(3) <sup>vi</sup>                                                  | 2.635(1)  | Sr(3)(Dy)–O(4) <sup>v</sup>    | 2.544(1)   | B(2)–O(5) <sup>vii</sup>                       | 1.368(2)  |
| Sr(1)–O(4) <sup>i</sup>                                                   | 2.5411(8) | Sr(3)(Dy)–O(4) <sup>viii</sup> | 2.544(1)   | B(2)–O(5) <sup>viii</sup>                      | 1.368(2)  |
| Sr(1)–O(4) <sup>ii</sup>                                                  | 2.5411(8) | Sr(3)(Dy)–O(5) <sup>i</sup>    | 2.813(1)   | B(3)–O(4) <sup>i</sup>                         | 1.355(1)  |
| Sr(1)–O(5) <sup>vii</sup>                                                 | 2.594(1)  | Sr(3)(Dy)–O(5) <sup>iv</sup>   | 2.813(1)   | B(3)–O(4) <sup>iv</sup>                        | 1.355(1)  |
| Sr(1)–O(5) <sup>viii</sup>                                                | 2.594(1)  | Sr(3)(Dy)–O(6) <sup>v</sup>    | 2.620(2)   | B(3)–O(6) <sup>i</sup>                         | 1.373(3)  |
| Sr(2)(Dy,Tm)–O(1) <sup>vii</sup>                                          | 2.5651(7) | K–O(1) <sup>i</sup>            | 2.935(2)   | O(2) <sup>i</sup> –B(1)–O(3) <sup>i</sup>      | 121.48(2) |
| Sr(2)(Dy,Tm)–O(3) <sup>iv</sup>                                           | 2.555(1)  | K–O(2) <sup>i</sup>            | 2.884(2)   | O(2) <sup>i</sup> –B(1)–O(3) <sup>ii</sup>     | 121.48(2) |
| Sr(2)(Dy,Tm)–O(3) <sup>v</sup>                                            | 2.525(1)  | K–O(3) <sup>i</sup>            | 2.876(2)   | O(3) <sup>i</sup> –B(1)–O(3) <sup>ii</sup>     | 116.21(2) |
| Sr(2)(Dy,Tm)–O(4) <sup>i</sup>                                            | 2.655(1)  | K–O(3) <sup>ii</sup>           | 2.876(2)   | O(1) <sup>i</sup> –B(2)–O(5) <sup>vii</sup>    | 118.97(2) |
| Sr(2)(Dy,Tm)–O(4) <sup>viii</sup>                                         | 2.630(1)  | K–O(5) <sup>iii</sup>          | 2.995(2)   | O(1) <sup>i</sup> –B(2)–O(5) <sup>viii</sup>   | 118.97(2) |
| Sr(2)(Dy,Tm)–O(5) <sup>i</sup>                                            | 2.482(1)  | K–O(5) <sup>iv</sup>           | 2.995(2)   | O(5) <sup>vii</sup> –B(2)–O(5) <sup>viii</sup> | 119.70(1) |
| Sr(2)(Dy,Tm)–O(5) <sup>viii</sup>                                         | 2.557(1)  | K–O(6) <sup>i</sup>            | 2.9804(7)  | O(4) <sup>i</sup> –B(3)–O(4) <sup>iv</sup>     | 122.99(1) |
| Sr(2)(Dy,Tm)–O(6) <sup>v</sup>                                            | 2.6012(4) | K–O(6) <sup>ii</sup>           | 2.9804(7)  | O(4) <sup>i</sup> –B(3)–O(6) <sup>i</sup>      | 118.50(2) |
| Sr(3)(Dy)–O(2) <sup>v</sup>                                               | 2.9727(7) | B(1)–O(2) <sup>i</sup>         | 1.379(3)   | O(4) <sup>iv</sup> –B(3)–O(6) <sup>i</sup>     | 118.50(2) |

i) x, y, z; ii) -x+1/2, y, z; iii) x+1/2, -y, z; iv) -x, -y, z; v) x, y+1/2, z+1/2; vi) -x+1/2, y+1/2, z+1/2; vii) x+1/2, -y+1/2, z+1/2; viii) -x, -y+1/2, z+1/2.

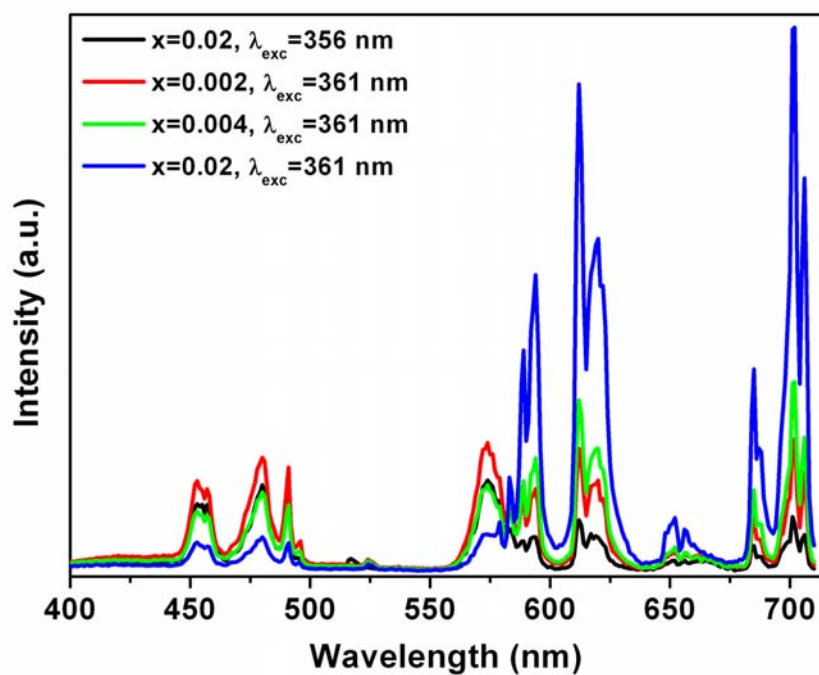

Figure S1. PL Spectra of  $\text{K Sr}_4(\text{BO}_3)_3:0.01\text{Dy}^{3+}, 0.005\text{Tm}^{3+}, x\text{Eu}^{3+}$  phosphors.

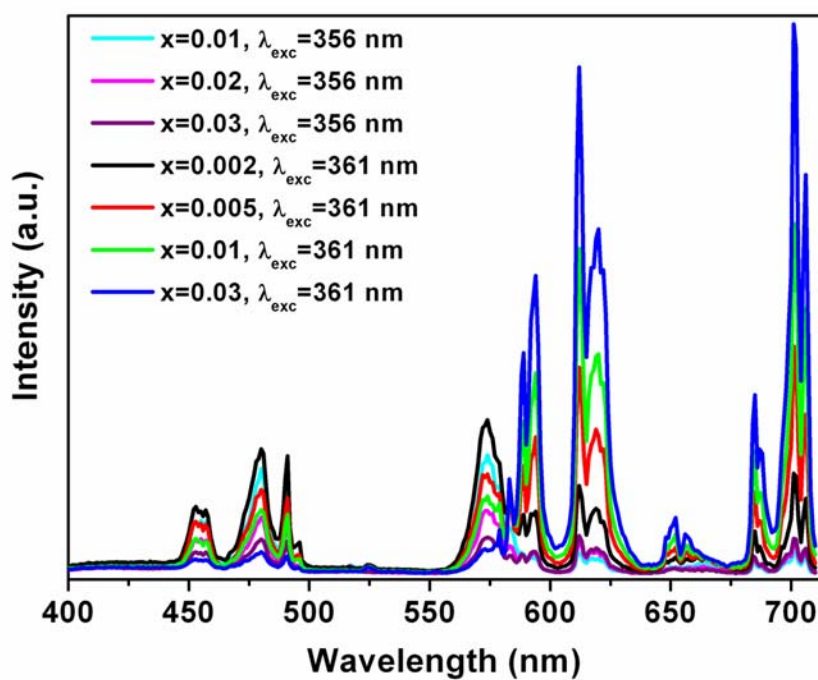

Figure S2. PL Spectra of  $\text{K Sr}_4(\text{BO}_3)_3:0.015\text{Dy}^{3+}, 0.005\text{Tm}^{3+}, x\text{Eu}^{3+}$  phosphors.

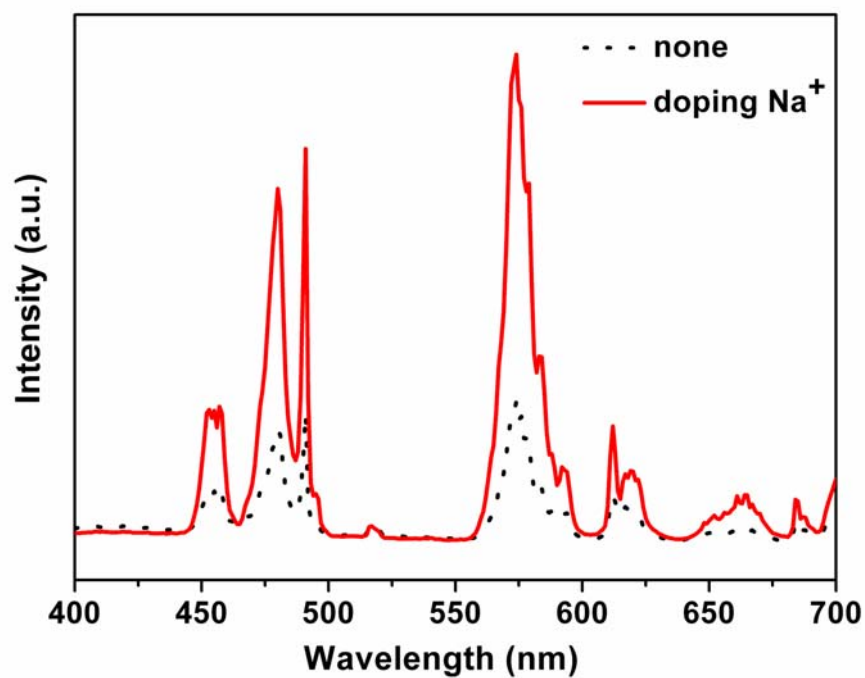

Figure S3. PL Spectra of  $\text{K Sr}_4(\text{BO}_3)_3:0.015\text{Dy}^{3+}, 0.005\text{Tm}^{3+}, 0.02\text{Eu}^{3+}, 0.04\text{Na}^+$  phosphor.

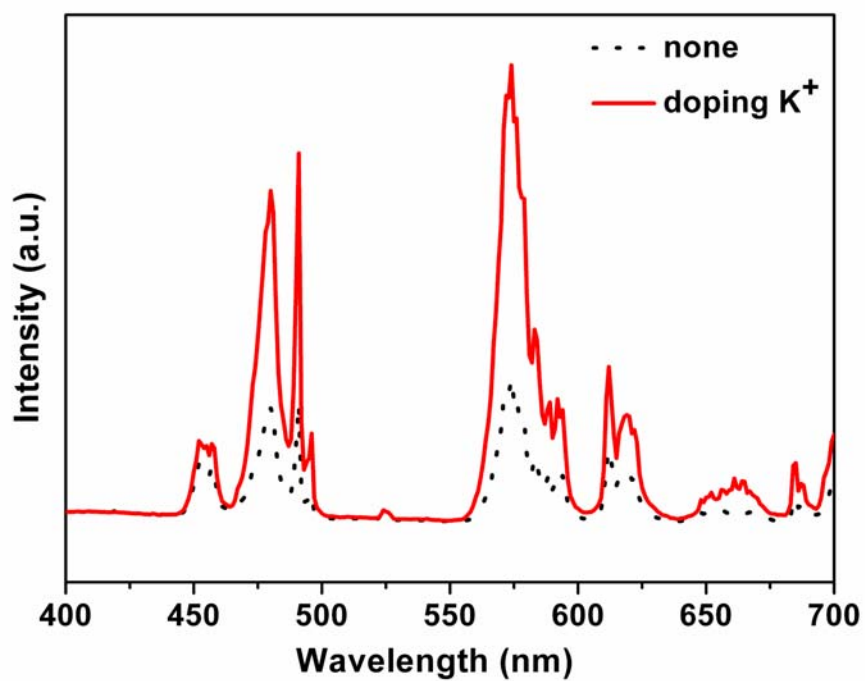

Figure S4. PL Spectra of  $\text{K Sr}_4(\text{BO}_3)_3:0.015\text{Dy}^{3+}, 0.005\text{Tm}^{3+}, 0.002\text{Eu}^{3+}, 0.022\text{K}^+$  phosphor.

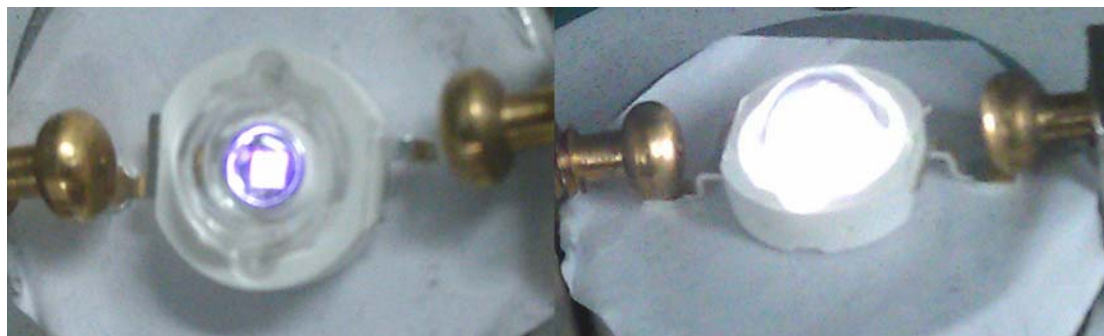

Figure S5. Photographs of a 368 nm UV LED chip (left) and the chip coated with  $\text{K Sr}_4(\text{BO}_3)_3:0.015\text{Dy}^{3+}, 0.005\text{Tm}^{3+}, 0.02\text{Eu}^{3+}$  (right).

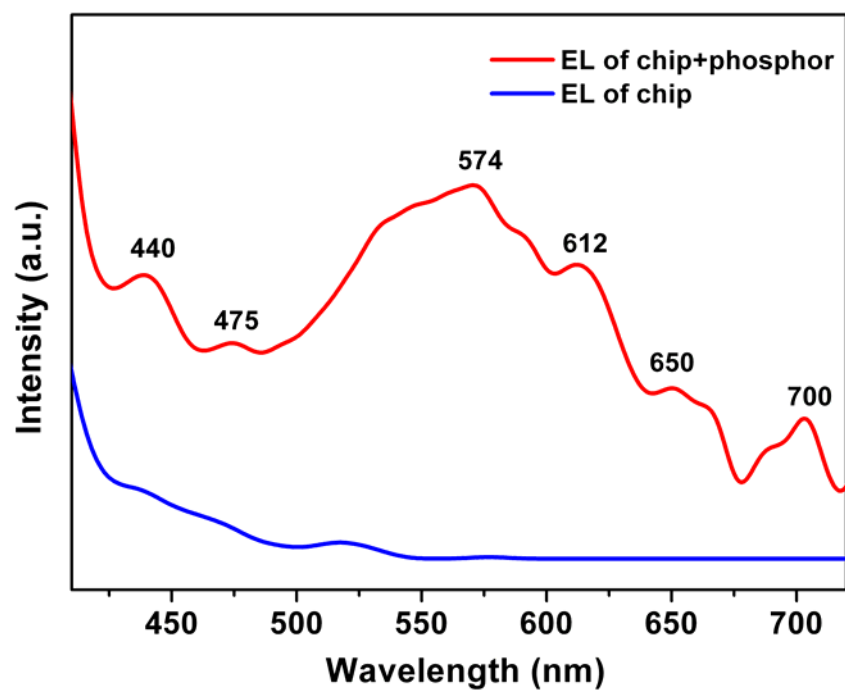

Figure S6. EL spectrum of the  $\text{K Sr}_4(\text{BO}_3)_3:0.015\text{Dy}^{3+}, 0.005\text{Tm}^{3+}, 0.02\text{Eu}^{3+}$  phosphor coated on a 368 nm UV chip.
